1 **Full title: Identification of diverse viruses associated with**  
2 **grasshoppers unveils phylogenetic congruence between hosts**  
3 **and viruses**

4  
5 **Short title: Identification of diverse viruses associated with**  
6 **grasshoppers**

7  
8 Yao Xu<sup>1</sup>, Jingyi Jiang<sup>1</sup>, Xiaojun Lin<sup>1</sup>, Wangpeng Shi<sup>1</sup>, Chuan Cao\*<sup>1</sup>

9 **1** Department of Entomology, China Agricultural University, No. 2 Yuanmingyuan  
10 West Road, Haidian District, Beijing, China

11 \* Corresponding author

12 Email: [chuancao@cau.edu.cn](mailto:chuancao@cau.edu.cn) (CC)

## 13 **Abstract**

14       Locusts and grasshoppers are one of the most dangerous agricultural pests.  
15       Environmentally benign microbial pesticides are increasingly desirable for controlling  
16       locust outbreaks in fragile ecosystems. Here we use metagenomic sequencing to profile  
17       the rich viral communities in 34 grasshopper species and report 322 viruses, including  
18       202 novel species. Most of the identified viruses are related to other insect viruses and  
19       some are targeted by antiviral RNAi pathway, indicating they infect grasshoppers.  
20       Some plant/fungi/vertebrate associated viruses are also abundant in our samples. Our  
21       analysis of relationships between host and virus phylogenies suggests that the  
22       composition of viromes is closely allied with host evolution, and there is significant  
23       phylogenetic relatedness between grasshoppers and viruses from *Lispiviridae*,  
24       *Partitiviridae*, *Orthomyxoviridae*, *Virgaviridae* and *Flaviviridae*. Overall, this study is  
25       a thorough exploration of viruses in grasshoppers and provide an essential evolutionary  
26       and ecological context for host-virus interaction in Acridoidea.

## 27 **Author Summary**

28       Locusts are the most destructive migratory pest in the world and continue to cause  
29       massive damages that endanger food security and threaten millions of people in 21<sup>st</sup>  
30       century. While chemical pesticides are still heavily relied on, biological pesticides  
31       developed from natural pathogens offer a reliable, less harmful alternative for  
32       controlling locust outbreaks in fragile ecosystems. Unfortunately, little is known  
33       about natural pathogens infecting this pest. In this study, we profile the viral

34 communities in 34 grasshopper species include some major swarming species. While  
35 we identified as many as 202 novel viral species associated with grasshoppers, some  
36 of them are of potential to be developed as biocontrol agents. Our analysis of  
37 relatedness of phylogenies of grasshoppers and associated viruses helps to shed light  
38 on the eco-evolutionary interactions between insects and viruses. This work provides  
39 a valuable dataset of both academic and applied interest.

## 40 **Introduction**

41       Locusts are grasshoppers that can form swarms and migrate long-distance. They  
42 are one of the most devastating threats to agriculture throughout human history. Even  
43 in the 21<sup>st</sup> century, locusts still cause massive damages that endangering food security  
44 and threatening millions of people [1]. There are currently more than 500 documented  
45 species of acridids (Orthoptera: Acridoidea) that can cause damage to pastures and  
46 crops, and about 50 are considered major pests [2]. Recent event of desert locusts  
47 (*Schistocerca gregaria*) swarms in Arabian Peninsula, East Africa, India and Pakistan  
48 since late 2019 were the worst upsurge seen in last seventy years for some countries  
49 [3]. Meanwhile, local outbreaks of the Moroccan locust (*Dociostaurus maroccanus*) in  
50 Central Asian countries, the Italian locust (*Calliptamus italicus*) in Russia and China,  
51 the South American locust (*Schistocerca cancellata*) in Paraguay and Argentina, the  
52 African migratory locust (*Locusta migratoria migratorioides*) in southern African  
53 countries as well as the Yellow-spined bamboo locust (*Ceracris kiangsu*) in Laos,  
54 Vietnam and China also cause major economic, social and environmental impacts [4].

55 Most grasshopper and locust control still rely on chemical pesticides, and this has  
56 raised many issues about human health, environment, non-target organisms and  
57 biodiversity [2]. In recent years, there are an increased use of alternative biological  
58 control methods. Biopesticides such as *Metarhizium acridum* and *Paranosema locustae*  
59 have been used in concerted controlling of grasshoppers and locusts in China and have  
60 successfully prevented migratory locusts reaching plague proportions [2, 5]. *M.*  
61 *acridum* has also been used in East Africa against recent desert locust infestation [6]  
62 and used operationally against the migratory locust in East Timor and against red  
63 locusts in East Africa [2]. Another promising control method is using  
64 entomopathogenic viruses, which are environmentally benign, species-specific and can  
65 spread horizontally and transmit vertically. However, to date, only a few viruses have  
66 been isolated and characterized in grasshoppers: entomopoxviruses in *Melanoplus*  
67 *sanguinipes* and in *Oedaleus senegalensis* [7]-9] and a picornavirus in *Schistocerca*  
68 *americana* [10]. *Melanoplus sanguinipes entomopoxvirus* (MSEV) has been  
69 investigated for their potential use as biological control agents against orthopteran  
70 insects as they infect many of major grasshopper and locust pest species [11-12].  
71 However, the slow occurring mortality has limited its broad use as microbial  
72 insecticides [13]. Thus, there is still a demand in discovering new viral pathogens that  
73 could be harnessed to control grasshoppers and locusts.

74 Apart from discovering novel viral biocontrol agents, understanding the nature of  
75 viral infections in grasshoppers may help to better understand the physiology,  
76 geographical establishment and evolution of these notorious pests. Recent

77 metatranscriptomic studies of a variety of insect species have revealed that they harbor  
78 an enormous diversity of RNA viruses [14-17]. Characterizing viromes with known  
79 hosts not only provides a better perspective on the taxonomy and evolution of viruses  
80 [18-19], but also sheds light on host-association and host-switching of viruses [20-21].  
81 More and more evidence has shown that the host lineage poses great influence on the  
82 composition as well as sequence divergence of virome, and viruses tend to jump  
83 between phylogenetically related host species [22-24]. Understanding host-  
84 switching/sharing of viruses will be of potential importance for biocontrol decisions in  
85 the future.

86 Orthopteran insects are an underrepresented groups in virome studies with  
87 reported viruses belonging to *Flaviviridae*, *Virgaviridae*, *Narnaviridae* and  
88 *Partitiviridae* in pan-arthropod virome studies [14, 16]. Here, we use a metagenomic  
89 approach to characterize the virome associated with 34 species of grasshoppers  
90 including many major agricultural pest species, with the emphasis on better  
91 characterizing the diversity and abundance of viruses and understanding their eco-  
92 evolutionary relationship with hosts.

## 93 **Results**

### 94 **Abundant and divergent viruses identified in grasshoppers**

95 Ten ribosome-depleted total RNAs extracted from six species from three locations  
96 were sequenced, generating 8.69 Gb to 15.59 Gb sequence data for each sample. For  
97 five of the species, 21.77-94.05% of reads can be mapped to viruses (S1 Table). For  
98 *Locusta migratoria*, only 3.29% of the reads mapped to viral-like sequences and

99 majority of reads cannot be mapped at all. Additional selected publicly available  
100 transcriptomic data of 28 species of grasshoppers collected across the world were also  
101 included in the analysis (S1 Table). These data sets were generated from mashed whole  
102 grasshoppers or specific tissues, and total bases obtained varies between 2.3 Gb to 13.8  
103 Gb.

104 Through a BLASTX search with assembled sequences, a total of 694 candidates  
105 viral contigs were identified. Using identifiable RdRp sequences (>200aa), we were  
106 able to assign 322 distinctive putative viruses to 44 virus families or unclassified viruses  
107 (Fig 1A, S2 Table). The number of viruses identified in each host species varied a lot,  
108 with *Chorthippus albonemus* collected from Qinghai containing as many as 47 viruses.  
109 Significant fewer viruses were identified in publicly available data sets, possibly  
110 because they were lab insect cultures and had smaller sequencing depth (Fig 1B).

111 In total, 106 positive single-stranded RNA (+ssRNA) viruses, 61 negative single-  
112 stranded RNA (-ssRNA) viruses, 48 double-stranded RNA (dsRNA) viruses, 10  
113 double-stranded DNA (dsDNA) virus and 17 single-stranded DNA (ssDNA) viruses  
114 were identified in our study (S2 Table). RNA viruses were the dominant type,  
115 comprising up to 89% of the identified viruses. Picorna-like viruses including viruses  
116 mainly from *Iflaviridae*, *Dicistroviridae*, *Soliniviridae* and *Polycipiviridae* were  
117 present in 19 grasshopper hosts, accounting for 29% of +ssRNA viruses (Fig 1A, S2  
118 Table). Mononega-like viruses and bunya-like viruses were the most common -ssRNA  
119 viruses identified, representing up to 57% of all -ssRNA viruses identified and present  
120 in more than 44% grasshopper hosts in this study. Partiti-like viruses found in 47%

121 grasshopper hosts and was the most common dsRNA virus. entomopoxviruses were the  
122 only eukaryotic dsDNA virus identified and were found in five grasshopper hosts. 17  
123 parvo-like ssDNA viruses were the only ssDNA virus identified and presented in 12  
124 grasshopper hosts (S2 Table).

125 The majority of newly identified viruses were highly divergent from previously  
126 reported viral sequences: 71% viruses shared less than 50% amino acid (aa) identity  
127 with their most closely related RdRp sequence (S2 Table). Based on ICTV species  
128 demarcation criteria (<https://talk.ictvonline.org/ictv-reports>), 202 viruses can be  
129 considered as novel species (details in S2 Table). This is a large number of novel viruses  
130 identified when compared to similar studies of other organisms (Fig 1C) and has  
131 substantially enriched the number of recorded orthopteran viruses [15, 19-20, 25-30].  
132 Novel viruses found in this study are named after their host species, related virus family  
133 like, followed by a number (*e.g. Chorthippus albonemus* chu-like virus 1). If one virus  
134 infects more than one host species, genus or family name of multiple hosts were used  
135 (*e.g. Gomphocerinae* chu-like virus). Complete or near-complete genome sequences  
136 were obtained in 65 novel viral species belonging to 22 families (S1 Data) and tentative  
137 genome structures were show in Figure 2. Viruses from the same family tend to share  
138 similar genome structure with exceptions of *Virgaviridae*, *Flaviviridae* and *Totiviridae*  
139 (Fig 2). *Virgaviridae* showed a great flexibility in genome size and arrangement.  
140 *Flaviviridae* contains both typical segmented genome and a substantially larger  
141 unsegmented genome [31]. Toti-like virus in grasshoppers could either encode a capsid  
142 protein or a novel proline-alanine rich protein, as described in a previous study [32].





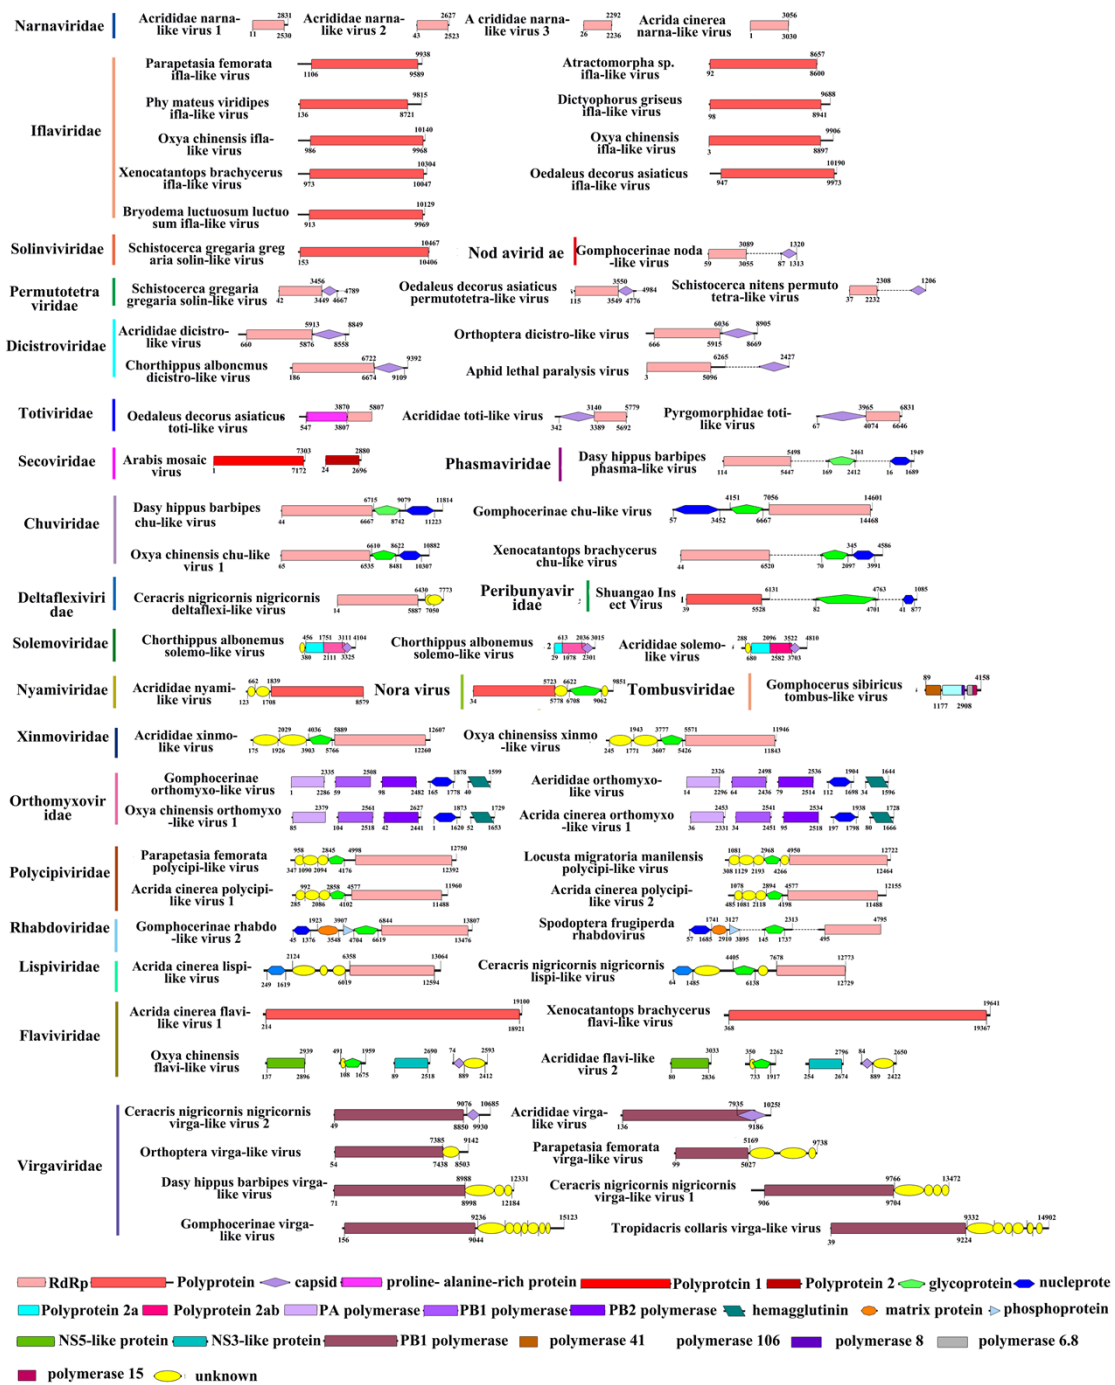

155 Contigs of 158 RdRps or conserved domains were grouped, and phylogenetic trees  
156 were generated following optimization of alignments. Thirteen trees were generated for  
157 3 viral orders and 29 virus families (Fig 3 and S1-9 Figs). Based on phylogenetic  
158 positions in relation to previously described viruses, we sought to make inferences for  
159 the hosts of all viruses. 173 identified viruses appear to be insect-associated (S2 Table).  
160 Some viruses that have plants or vertebrates as potential primary hosts also exhibit high  
161 transcript levels in the analysis such as Acrididae solemo-like virus and Acrididae  
162 dicistro-like virus (S3 Table). This indicates that grasshoppers can harbor high copies  
163 of plant and vertebrate viruses, which they may acquire through feeding on virus-  
164 contaminated food.

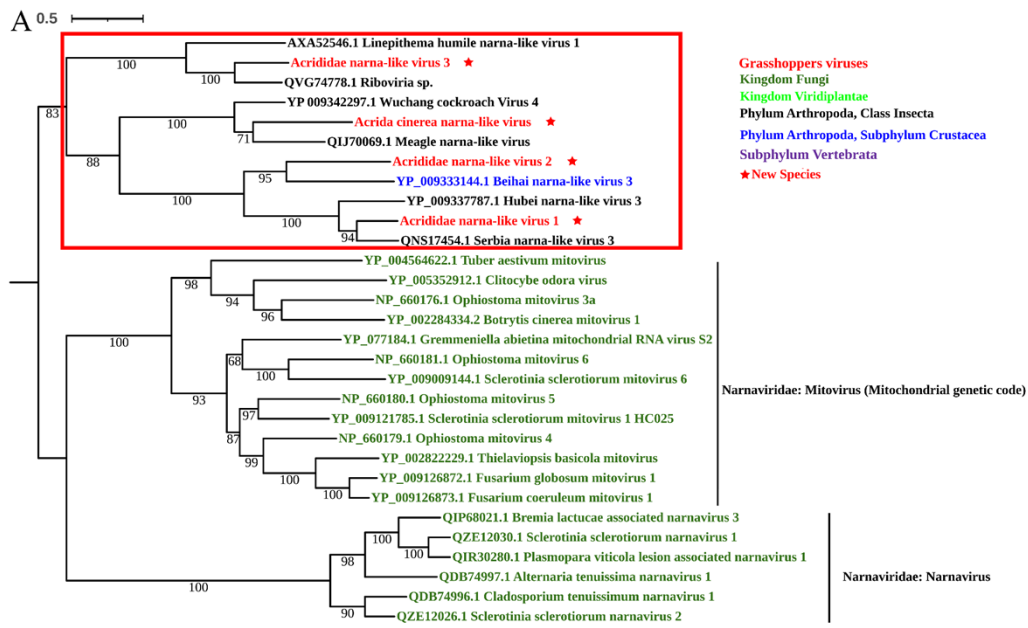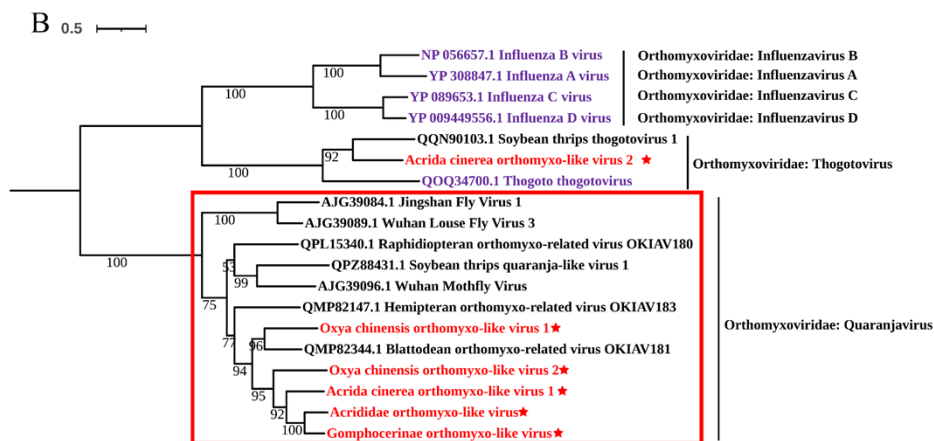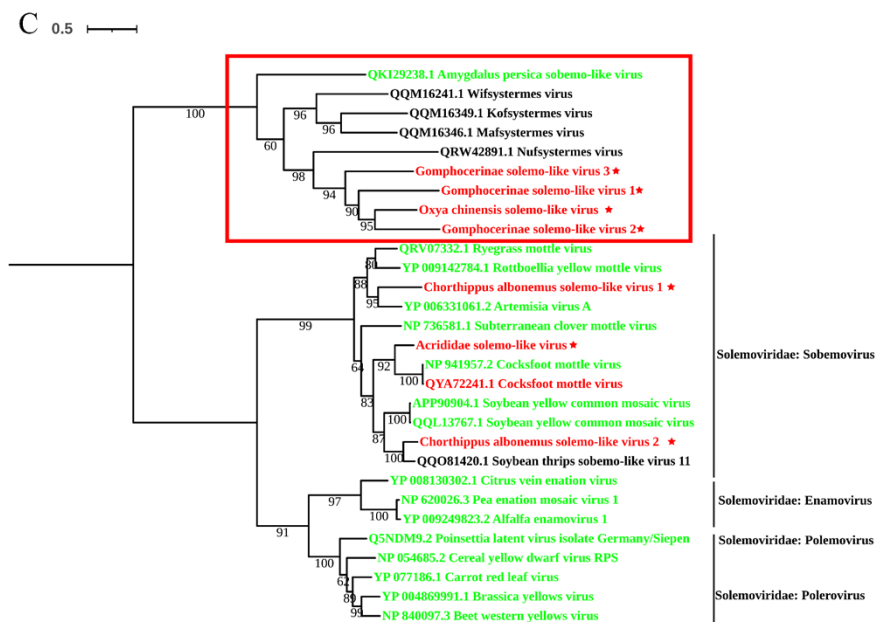

166 **Fig 3. ML phylogenies of *Narnaviridae*, *Orthomyxoviridae* and *Solemoviridae*.**

167 (A) Phylogenetic tree of *Narnaviridae* constructed using RdRp sequences. (B)  
168 Phylogenetic tree of *Orthomyxoviridae* constructed using PB1 polymerase. (C)  
169 Phylogenetic tree of *Solemoviridae* constructed using replicase sequences. Viruses are  
170 colored differently according to their hosts. The viruses described in this study are  
171 marked in red and novel viruses have red solid stars at the back of their names.

172 Interestingly, we found certain viral families that were considered only infecting  
173 plant/fungus/vertebrate hosts had formed a separate clade containing viruses discovered  
174 in arthropods/insects. For example, four novel narna-like viruses found in this study  
175 formed a distinct clade together with viruses discovered in *Linepithema* ants,  
176 cockroaches and other arthropods (Fig 3A); five novel orthomyxo-like viruses grouped  
177 together and formed a separate clade with viruses found in flies, thrips and other  
178 blattodean and hemipteran insects (Fig 3B); four novel solemo-like viruses grouped  
179 together with viruses found in termites (Fig 3C). These insect/arthropod associated  
180 virus clades may expand the host range and help to fill evolutionary gaps within these  
181 virus families that were previously thought to be plant/fungus/vertebrate specific.

182 **Phylosymbiosis detected between grasshoppers and their viruses**

183 Although environmental factors are considered to play an essential role, host  
184 genetics and evolutionary history may also affect the composition of host virome. If  
185 hosts influence a sufficient amount of the composition of virome, then hosts with  
186 greater genetic divergence may exhibit more distinguishable viral composition [33-34].  
187 We constructed host phylogeny of ten grasshopper species based on amino acid  
188 alignments of the mitochondrial genome and it was consistent with Song et al., (2020)  
189 [35]. The viral dendrogram was generated from Bray-Curtis beta diversity of the viral  
190 metagenomes of corresponding host species. Host phylogeny showed significant

191 congruence with the branching pattern of the viral dendrogram ( $I_{cong}=1.46, p<0.01$ ) (Fig  
192 4). This result suggests a phyllosymbiotic relationship between grasshopper host and  
193 viral beta diversity, meaning that evolutionary changes in the host are associated with  
194 ecological changes in the virome [33].

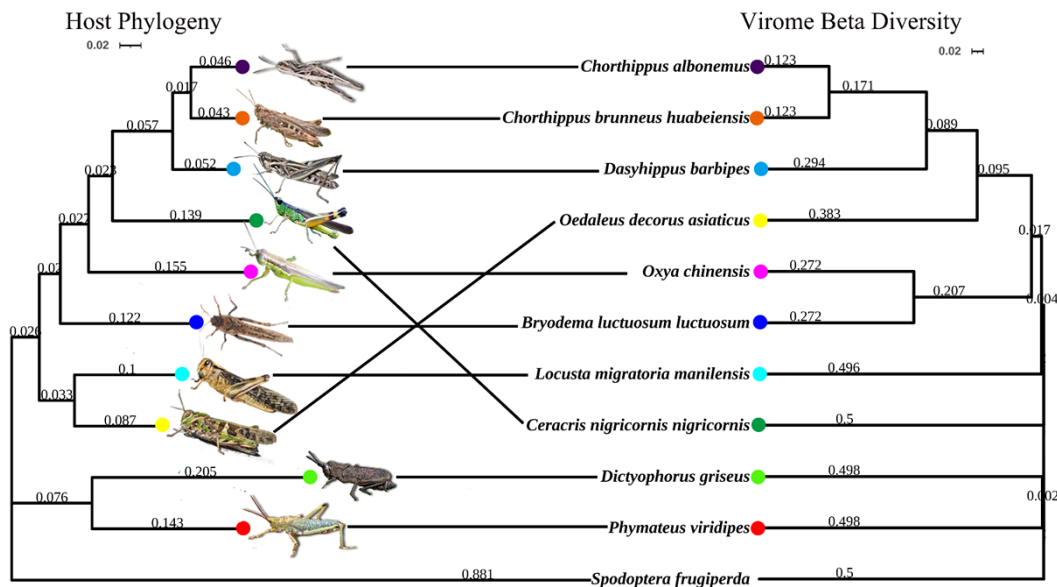

195  
196 **Fig 4. Phyllosymbiosis between ten grasshopper species and their**  
197 **communities.** The host phylogeny is constructed based on the cytochrome oxidase I  
198 gene, and the UPGMA hierarchical cluster relationships of the viromes are based on  
199 Bray-Curtis beta diversity distances. The topological similarity and significance  
200 between the host phylogeny and the virome clustergram was determined by calculating  
201 a congruence index described in De Vienne et al., (2007) [36] ( $I_{cong}=1.46, p<0.01$ ).  
202 Horizontal lines connect species whose position is concordant between host phylogeny  
203 and virome clustergram. *Spodoptera frugiperda* and its virome data were used as  
204 outgroups for the analysis.

205 We used a modified Mantel permutation test [37-38] to test if the phylogenetic tree  
206 of a virus family is related to the phylogenetic tree of their hosts. The host phylogeny  
207 was constructed for 32 species that have near-complete mitochondrial genome. The

208 topology of the phylogeny of virus families were compared with that of their hosts using  
209 their pairwise patristic distances. Results showed that the patristic distances of families  
210 *Lispiviridae* ( $r=0.88$ ,  $P<0.05$ ), *Partitiviridae* ( $r=0.62$ ,  $P<0.005$ ), *Orthomyxoviridae*  
211 ( $r=0.44$ ,  $P<0.05$ ), *Virgaviridae* ( $r=0.38$ ,  $P<0.05$ ) and *Flaviviridae* ( $r=0.31$ ,  $P<0.05$ )  
212 were significantly correlated with their host patristic distance. This congruence of virus  
213 and host phylogenies indicates that these viruses may coevolve with their primary  
214 grasshopper hosts.

## 215 **Natural prevalence and cross-species transmission of grasshopper** 216 **viruses**

217 To examine if some viruses can infect diverse hosts, we applied PCR tests on  
218 multiple natural populations of grasshoppers collected in year 2018 and 2021. Five  
219 species of grasshoppers were collected from Qinghai in 2018 and only three viruses out  
220 of 53 tested could be detected in some Qinghai populations. The natural infection rates  
221 of these three viruses were provided in Table 1.

**Table 1. The average natural infection rates of viruses in the wild**

| Hosts\Virus                      | Acrididae<br>narna-like<br>virus 1 | Acrididae<br>permutotetra-like<br>virus | Gomphocerinae<br>permutotetra-like<br>virus |
|----------------------------------|------------------------------------|-----------------------------------------|---------------------------------------------|
| <i>Chorthippus dubius</i>        | 63%                                | 46%                                     | 19%                                         |
| <i>Chorthippus<br/>albonemus</i> | 43%                                | 52%                                     | 17%                                         |
| <i>Chorthippus fallax</i>        | 0.00                               | 28%                                     | 0.00                                        |

222

223 We also collected *Dasyhippus barbipes* and *Bryodema luctuosum luctuosum* in  
224 2019 and 2021 separately. Through PCR tests, 67% of the viruses identified in 2019  
225 were found in *B. luctuosum luctuosum* collected in 2021, while only 22% of viruses  
226 identified in 2019 were detected in *D. barbipes* grasshoppers in 2021 (S4 Table).

227 Co-occupying the same ecological niches may facilitate cross-host transmission of  
228 certain viruses. Viruses from families *Naranaviridae* and *Permutotetraviridae* tend to  
229 infect multiple host species (S2 Table). For example, Acrididae narna-like virus 1 was  
230 present in seven host species, Acrididae narna-like virus 3 was present in four host  
231 species, Acrididae permutotetra-like virus was present in five host species. This result  
232 indicates that viruses from these families may be transmitted more often across different  
233 host species.

### 234 **Antiviral RNAi against various viruses in *Locusta migratoria***

235 Different from intensively studied RNAi response in *Drosophila melanogaster*,  
236 previous study did not find typical siRNA 21nt peak nor piRNA pattern in the  
237 distribution of virus-derived siRNAs (vsiRNAs) in *L. migratoria* [39]. Using Lewis'  
238 dataset (SRA: SRS2228471, SRS2228473) [39], we identified contigs of seven DNA  
239 viruses and one +ssRNA virus, including five insect-specific viruses: a granulovirus,  
240 an entomopoxvirus, an iridovirus and two nucleopolyhedraviruses. After filtering host  
241 genome sequence, oxidation-treated sRNAs were mapped to viral contigs and  
242 interestingly, seven of them (except for a virga-like virus) showed a 22nt peak in their  
243 distributions (Fig 5A). This indicates that *L. migratoria*'s antiviral RNAi pathway may  
244 generate 22nt biased sRNA for some DNA and RNA viruses.

245 To further explore siRNA-based antiviral immunity in grasshoppers, we carried  
246 out small RNA sequencing on the same *L. migratoria* samples which we used for virus  
247 RNAseq. Among 25 viruses that were found in *L. migratoria*, sRNAs were successfully  
248 mapped to contigs of seven viruses after filtering out host genome sequences. sRNAs  
249 mapped to Acrididae narna-like virus 2, 3 and Acrididae xinmo-like virus also showed  
250 an obvious enrichment in 22nt (Fig 5B). Other five viruses including three +ssRNA  
251 viruses, one -ssRNA virus and one dsRNA virus, did not show obvious 21nt nor 22nt



252 peak (Fig 5B). In either dataset, we did not find virus-derived piRNAs that bearing the  
 253 signature of ping-pong amplification. Notably, for many viruses such as Oedipodinae  
 254 noda-like virus, Acrididae solemo-like virus, Drosophila A virus that have high  
 255 abundance in the host (S3 Table), no sRNA was found mapped to them. These results  
 256 suggest that antiviral RNAi pathways is actively involved in response to viruses and the  
 257 distribution of sRNA may vary for different viruses.

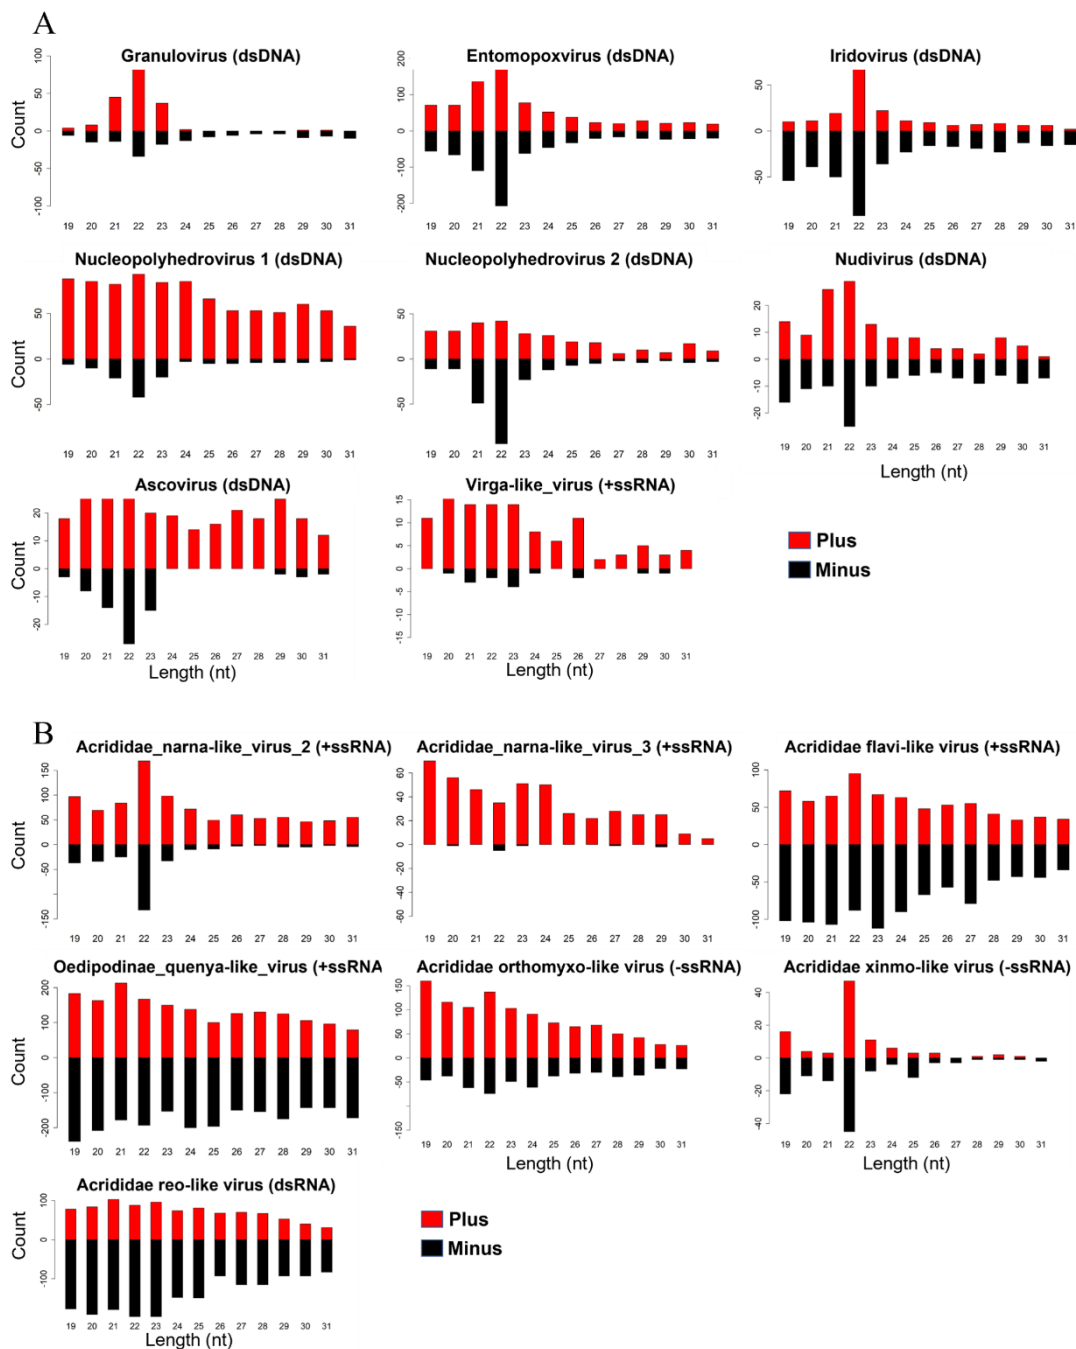

258



259 **Fig 5. Small RNA size distribution.** (A) Small RNA distribution of eight viruses  
260 identified using data from Lewis et al., (2018) [39]. (B) Small RNA distribution of  
261 seven viruses identified in this study.

## 262 **Discussion**

263 In this study, we present the first survey of virome of a notorious insect pest,  
264 grasshoppers, and demonstrate that they harbor a diverse range of viruses. Overall, 215  
265 RNA viruses and 27 DNA viruses were identified. These viruses are quite divergent  
266 from previous known species, and 202 of them can be considered as novel species.  
267 Although the potential of these viruses be used as biological control agents is currently  
268 unclear, there are some good candidates. For example, entomopoxvirus and densovirus  
269 have been registered as biocontrol agents [40] and we identify three novel  
270 entomopoxviruses and 17 novel densoviruses infecting five and twelve host species  
271 separately. Genes of another identified virus, iridovirus, are explored as biocontrol  
272 compounds for their toxicity effect on insect hosts [41]. Reovirus which was recorded  
273 causing epizootics in natural populations of insects was also found in six grasshopper  
274 species in this study [42]. Note that sequences of baculovirus and granulovirus which  
275 are broadly used biopesticides were also found when we analysed Lewis' data [39], but  
276 they are not present in our data. Further isolation and pathogenicity assays are required  
277 to evaluate the potential use of these viruses as control agents.

278 Among all identified viruses, 71% of them are believed to be insect-associated  
279 based on virus phylogenies. Another 39 plant/fungus-associated viruses and 8  
280 vertebrate-associated viruses were identified. Grasshoppers may ingest these viruses  
281 from contaminated food. It is not clear if these viruses can infect and replicate in  
282 grasshoppers with one exception: we are able to find Acrididae solemo-like virus (a  
283 plant virus) in *L. migratoria* infected with crude virus extract but not in the control

284 (unpublished data). However, high abundance of some of these plant and vertebrate  
285 viruses in grasshoppers provide a possibility that viruses may transmit from insects back  
286 to plant and animal hosts by contacting or feeding [43-45]. Thus, grasshoppers are  
287 potential vectors of plant and vertebrate viruses and may facilitate transmission of these  
288 viruses.

289 Whether host genetics play an essential role in shaping the virome composition  
290 and in the evolution of viruses remains an intriguing question. Of the ten grasshopper  
291 species that were analysed, significant topology congruence between host phylogeny  
292 tree and virus Bray-Curtis beta dendrogram were found. This suggests that in natural  
293 environment, phyllosymbiotic relationship may exist between these grasshoppers and  
294 their virome. In addition, we find significant relatedness between host phylogeny and  
295 phylogenies of Lispi-like, Partiti-like, Orthomyxo-like and Flavi-like viruses. These  
296 virus families are either recently proposed monogenetic families or contain newly  
297 discovered insect-specific clades [28, 31]. Many other studies have found  
298 phyllosymbiosis between hosts and microbial communities (mostly bacteria and fungi)  
299 in a diverse range of systems under controlled regimes [33, 46] and under natural  
300 environment [47-48]. In certain plant [49] and animal [50] systems, significant  
301 phyllosymbiosis were also found between hosts and virus communities. Our results  
302 highlight that host phylogeny is significantly associated with its virome composition  
303 and virus evolution. However, we need to be cautious about these conclusions for 1)  
304 there is considerable topological uncertainty in virus phylogenies and 2) functional  
305 studies of both hosts and viruses are required. Nevertheless, with better characterizing  
306 of viruses associated with wider insect hosts, we will have a better chance of  
307 understanding the eco-evolutionary relationships between hosts and viruses.

308 By co-analysis of metagenomics and sRNA data, we are able to show that the  
309 antiviral RNAi may play an essential role in defense against viruses in *L. migratoria*.  
310 The virus-derived interfering RNA (viRNA) profile of *L. migratoria* shows a 22nt peak  
311 for both DNA and RNA viruses. Similar viRNAs distributions were observed in other  
312 insects, such as in whiteflies [24], thrips [29] and bumblebees [27]. It is possible that  
313 the 21nt peak we seen in brachycera species such as flies and mosquitoes is unusual for  
314 insects [51-52].

315 Like all other metagenomics studies, our work has several limitations [53]. For  
316 instance, our virus identification purely based on sequence homology search. With high  
317 divergence, only the most conserved sequences are recognizable at the protein level.  
318 Indeed, for many novel viruses found in this study, especially those with segmented  
319 genomes, we had difficulty in identifying other proteins besides the RdRp. Moreover,  
320 we had difficulty in determining if these identified viruses are grasshopper-infecting.  
321 Additional sRNA sequencing would be useful in solving this issue in the future.  
322 Nevertheless, this study is a significant addition to our understanding of the abundance  
323 and diversity of insect-associated viruses and their molecular, evolutionary interactions  
324 with insect hosts, providing a rich resource for developing biological control agents for  
325 controlling grasshopper and locust pests.

## 326 **Materials and methods**

### 327 **Sample collection and virus isolation**

328 Grasshoppers were collected by sweep-netting grassland from ten locations in  
329 Inner Mongolia and Qinghai, China between 2018 and 2021, with an average of 618  
330 individuals per species (S1 Table). *Locusta migratoria* were purchased from a  
331 grasshopper breeding center, Hebei, China. Species were identified using

332 morphological characteristics and mitochondrial cytochrome c oxidase subunit I gene  
333 (COI) sequences.

334 Crude virus purification was performed for *C. albonemus*, *Chorthippus brunneus*  
335 *huabeiensis*, *D. barbipes*, *B. luctuosum luctuosum*, *Oedaleus decorus asiaticus*  
336 collected in Inner Mongolia, *C. albonemus* collected in Qinghai, and *L. migratoria*.  
337 Briefly, pools of grasshoppers of the same species were homogenized in Ringer's  
338 solution and debris removed by low-speed centrifugation at  $500 \times g$  for 10 min. The  
339 supernatant was layered on top of a discontinuous sucrose gradient (30%, 40%, 50%,  
340 60% w/v) and centrifuged at  $64,000 \times g$  for 3 hours in A27-8 $\times$ 50 mL rotor (Beckman  
341 Coulter). The visible virus bands were collected, mixed, and centrifuged for 2 h at  
342  $64,000 \times g$  in A27-8 $\times$ 50 mL rotors (Beckman Coulter) to sediment virus particles. Viral  
343 particles were then suspended in 500  $\mu$ L of DNase/RNase-Free water (Solarbio).

#### 344 **RNA sequencing and reads assembly**

345 Total viral RNA was extracted using TRIzol LS reagent (Invitrogen, Carlsbad, CA)  
346 according to the manufacturer's instructions. Viral RNA quality was examined using  
347 NanoDrop 2000 (ThermoFisher Scientific, Waltham, MA) and Agilent 2100  
348 bioanalyzer (ThermoFisher Scientific, CA, USA). Residual Ribosomal RNA (rRNA)  
349 was depleted using Ribo-Zero™ kits (Epicentre, Madison, WI) before library  
350 construction. Libraries were constructed using a TruSeq total RNA library preparation  
351 kit (Illumina) and paired-end (250-300bp) sequencing was performed on the HiSeq-  
352 PE150 platform (Illumina, San Diego, CA). Additionally, RNA-Seq data of 28  
353 grasshoppers collected worldwide were retrieved from the NCBI database (S1 Table).  
354 Sequencing reads were quality trimmed using trimmomatic and *de novo* assembled  
355 using the Trinity version 2.8.6 with default parameter settings and the minimum contig  
356 length was set at 200nt [54].

## 357 **Discovery of viral sequences**

358       The assembled contigs were compared to reference viral protein database (taxid:  
359 10239) downloaded from NCBI using Diamond BLASTx version 2.0.11 [55], with e-  
360 value cut-offs of  $1 \times 10^{-5}$ . To eliminate false positives, the putative viral contigs were  
361 then compared to the entire non-redundant protein database (nr) of NCBI using  
362 Diamond BLASTx version 2.0.11 [55]. Contigs with credible, significant BLAST hits  
363 (e-value  $< 1 \times 10^{-5}$ ) to only viral proteins were kept for further analysis. To detect  
364 highly divergent viruses, open reading frames were predicted using the open-source  
365 NCBI ORF finder (<https://www.ncbi.nlm.nih.gov/orffinder/>). Predicted amino acid  
366 sequence lengths less than 200aa were removed from following analysis. To reduce  
367 redundancy, amino acid sequences were grouped based on sequence identity using the  
368 CD-HIT package version 4.6.5 [56]. Predicted ORFs without any BLASTx hits were  
369 searched for homologous proteins in the protein families (PFAMs) database  
370 (<http://ftp.ebi.ac.uk/pub/databases/Pfam/releases/Pfam33.1/Pfam-A.hmm.gz>) and the  
371 RNA-dependent RNA polymerase (RdRp) database of RNA viruses by the use of  
372 HMMER version 3.3 [15, 57].

373       The structure of near complete viral genomes was annotated after comparing them  
374 against the entire non-redundant protein database and the genome of the closest virus  
375 using BLASTp. To estimate virus abundance in each library, Salmon version 1.4.0 [58]  
376 was used to calculate the number of transcripts per million (TPM) of each contig, which  
377 was normalized by sequencing depth (total number of reads) and sequence length.

## 378 **Phylogenetic analysis**

379       The RdRp or polyproteins of viruses discovered in this study were aligned with  
380 sequences of known viruses from same families using MAFFT version 7.158 with the  
381 E-INS-i algorithm [59]. For a phylogeny tree of major RNA viruses, poorly aligned

382 regions were removed using trimAl version 1.4.1 with a maximum gap threshold of 0.8  
383 and minimum similarity threshold of 0.001 [60]. Phylogenetically informative sites  
384 were selected using Gblocks version 0.91b [61]. Maximum likelihood (ML)  
385 phylogenetic trees were constructed using IQ-TREE version 1.6.12 with 1,000  
386 bootstraps [62], and the best amino-acid substitution model were determined by Raxml  
387 version 2.0 [63]. COI sequences or near-complete mitochondrial genomes of  
388 grasshoppers were aligned using MAFFT version 7.158 with the E-INS-i algorithm [59].  
389 Maximum likelihood trees of the grasshoppers were constructed using the same method  
390 described above.

### 391 **Comparing phylogenies of grasshoppers and viruses**

392 A Modified Mantel permutation test [37-38] was used to test if the phylogenetic tree of  
393 each virus family was related to the phylogenetic tree of a host. The host phylogeny  
394 was constructed for 32 species that have complete or near-complete mitochondria  
395 genome. The topology of the phylogeny of virus families were compared with that of  
396 their hosts using their pairwise patristic distances calculated by ParaFit [64] using the  
397 R package ape. P-values were calculated from 10,000 iterations of randomized host-  
398 virus associations. R version 4.1.1 was used [65].

399 Virome similarities between hosts were measured by Bray-Curtis distances and  
400 employing unweighted pair-group method with arithmetic means (UPGMA) [34]. The  
401 R packages Vegan version 2.5-6 [66] was used to calculate Bray-Curtis distances using  
402 the virus abundance in each library (TPM) and constructed UPGMA clustergrams  
403 between host viromes. The topological similarity and significance between the host  
404 phylogeny and the virome clustergram was determined by calculating a congruence  
405 index described in De Vienne et al., (2007) [36]. *Spodoptera frugiperda* and its virome  
406 data were used as outgroups for the analysis [67].

## 407 **Testing prevalence of viruses in natural grasshopper populations**

408 To survey the prevalence of viruses discovered in this study, we examined the  
409 presence of 53 virus species in 5 wild grasshoppers' populations sampled across 9  
410 locations in Qinghai Province, China, with an average of 85 individuals per  
411 population (S1 Table). Total virus RNA was prepared from these grasshoppers as  
412 described above. Reverse transcription was carried out using PrimeScript<sup>TM</sup>RT  
413 reagent Kit (Takara) using random hexamers and PCR was performed with  
414 PrimeSTAR Max DNA Polymerase (Takara). Primers were designed based on the  
415 assembled viral contigs. We tried to design degenerate primers based on conserved  
416 positions for similar viruses and specific primers for poorly conserved virus sequences  
417 (S5 Table).

418 We also checked the prevalence of the identified viruses from *D. barbipes* and *B.*  
419 *luctuosum luctuosum* populations in different years. In summer 2021, we collected  
420 grasshoppers in same locations of 2019 and performed PCR for 42 virus species.  
421 Specific primers were designed for each of identified viruses from *D. barbipes* and *B.*  
422 *luctuosum luctuosum* populations (S4 Table).

## 423 **Small-RNA Sequencing and data analysis**

424 *Locust migratoria* were collected and used for small RNA sequencing. Total  
425 RNA was extracted and small RNA sequencing was performed using the high-  
426 throughput Illumina nova6000 sequencing technology. Two samples were sequenced  
427 1.194 Gb and 1.292 Gb sRNA data were generated for each sample. The same RNA  
428 samples were also used for metatranscriptomic sequencing and virus contigs were  
429 obtained used methods above. The sRNA sequences obtained were put through  
430 quality control then mapped to *L. migratoria* genome [68] to remove host sequences.

431 Filtered reads were then mapped to various viral contigs using bowtie2 version 2.4.4.

432 The distribution of sRNAs was analyzed using R package viRome [69].

## 433 **Acknowledgements**

434 We thank Wang Huiping, Nie Weilei, Ume Hani, Yang Kejia, Tian Jingjing,

435 Feng Mingyue for their assistance in collecting samples.

## 436 **References**

437 1. Pflüger HJ, Bräunig P. One hundred years of phase polymorphism research in  
438 locusts. *J Comp Physiol A*. 2021;207:321-6.

439 2. Zhang L, Lecoq M, Latchininsky A, Hunter D. Locust and Grasshopper  
440 Management. *Annu Rev Entomol*. 2019;64:15-34.

441 3. Food and Agriculture Organization of the United Nations. FAO appeals for urgent  
442 support to fight worsening Desert Locust upsurge in the Horn of Africa 2020. Available  
443 from: <https://www.fao.org/news/story/en/item/1259082/icode/>.

444 4. Klein I, Oppelt N, Kuenzer C. Application of remote sensing data for locust  
445 research and management—a review. *Insects*. 2021;12:233.

446 5. Shi WP, Wang XY, Yin Y, Zhang YX, Rizvi UeH, Tan SQ, et al. Dynamics of  
447 aboveground natural enemies of grasshoppers, and biodiversity after application of  
448 *Paranosema locustae* in Rangeland. *Insects*. 2019;10:224.

449 6. Food and Agriculture Organization of the United Nations. Biopesticides for locust  
450 control. 2021. Available from: <https://www.fao.org/fao-stories/article/en/c/1267098/>.

451 7. Henry JE, Nelson BP, Jutila JW. Pathology and Development of the Grasshopper  
452 Inclusion Body Virus in *Melanoplus sanguinipes*. *J Virol*. 1969;3:605-10.



- 453 8. Vandenberg JD, Streett DA, Herbert EW. Safety of Grasshopper  
454 Entomopoxviruses for caged adult honey bees (Hymenoptera: Apidae). J Econ Entomol.  
455 1990;83:784-7.
- 456 9. Afonso CL, Tulman ER, Lu Z, Oma E, Kutish GF, Rock DL. The Genome of  
457 *Melanoplus sanguinipes* Entomopoxvirus. J Virol. 1999;73:533-52.
- 458 10. Henry JE, Oma EA. Ultrastructure of the replication of the grasshopper crystalline-  
459 array virus in *Schistocerca americana* compared with other picornaviruses. J Invertebr  
460 Pathol. 1973;21:273-81.
- 461 11. Jaeger B, Langridge W. Infection of *Locusta migratoria* with Entomopoxviruses  
462 from *Arphia conspersa* and *Melanoplus sanguinipes* Grasshoppers. J Invertebr Pathol.  
463 1984;43:374-82.
- 464 12. Streett DA, Oma EA, Henry JE. Cross Infection of Three Grasshopper Species with  
465 the *Melanoplus sanguinipes* Entomopoxvirus. J Invertebr Pathol. 1990;56:419-21.
- 466 13. Erlandson M. Insect pest control by viruses. 3rd Ed. Encyclopedia of Virology.  
467 2008. pp. 125-33.
- 468 14. Shi M, Lin XD, Tian JH, Chen LJ, Chen X, Li CX, et al. Redefining the invertebrate  
469 RNA virosphere. Nature. 2016;540:539-43.
- 470 15. Käfer S, Paraskevopoulou S, Zirkel F, Wieseke N, Drosten C. Re-assessing the  
471 diversity of negative strand RNA viruses in insects. PLoS Pathog. 2019;15:e1008224.
- 472 16. Wu H, Pang R, Cheng T, Xue L, Wu Q. Abundant and diverse RNA viruses in  
473 insects revealed by RNA-Seq analysis: ecological and evolutionary implications.  
474 mSystems. 2020;5:e00039-20.
- 475 17. Chang T, Hirai J, Hunt BP, Suttle CA. Arthropods and the evolution of RNA  
476 viruses. bioRxiv2021. Available from: <http://dx.doi.org/10.1101/2021.05.30.446314>.

- 477 18. Tokarz R, Williams SH, Sameroff S, Leon MS, Jain K, Lipkin WI. Virome  
478 Analysis of *Amblyomma americanum*, *Dermacentor variabilis*, and *Ixodes scapularis*  
479 ticks reveals novel highly divergent vertebrate and invertebrate viruses. J Virol.  
480 2014;88:11480-92.
- 481 19. Webster CL, Waldron FM, Robertson S, Crowson D, Obbard DJ. The discovery,  
482 distribution, and evolution of viruses associated with *Drosophila melanogaster*. PLoS  
483 Biol. 2015;13:e1002210.
- 484 20. Li CX, Shi M, Tian JH, Lin XD, Kang YJ, Chen LJ, et al. Unprecedented genomic  
485 diversity of RNA viruses in arthropods reveals the ancestry of negative-sense RNA  
486 viruses. eLife. 2015;4:e05378.
- 487 21. Parry R, Asgari S. Discovery of novel crustacean and cephalopod flaviviruses:  
488 insights into evolution and circulation of flaviviruses between marine invertebrate and  
489 vertebrate hosts. J Virol. 2019;93:e00432-19.
- 490 22. Longdon B, Brockhurst MA, Russell CA, Welch JJ, Jiggins FM, Hobman TC. The  
491 evolution and genetics of virus host shifts. Plos Pathog. 2014;10:e1004395.
- 492 23. Longdon, Murray G, Palmer WJ, Day JP, Parker DJ, Welch JJ, et al. The evolution,  
493 diversity, and host associations of rhabdoviruses. Virus Evol. 2015;1:vev014.
- 494 24. Huang HJ, Zhuang XY, Wang X, Xiao TY. Diversity and infectivity of the RNA  
495 virome among different cryptic species of an agriculturally important insect vector:  
496 whitefly *Bemisia tabaci*. npj Biofilms Microbi. 2021;7:43.
- 497 25. Shi M, Lin XD, Xiao C, Tian JH, Chen LJ, Li K, et al. The evolutionary history of  
498 vertebrate RNA viruses. Nature. 2018;561:197-202.
- 499 26. Harvey E, Rose K, Eden J-S, Lawrence A, Doggett SL, Holmes EC. Identification  
500 of diverse arthropod associated viruses in native Australian fleas. Virology.  
501 2019;535:189-99.

- 502 27. Pascall DJ, Tinsley MC, Obbard DJ, Wilfert L. Host evolutionary history predicts  
503 virus prevalence across bumblebee species. *bioRxiv*2019. Available from:  
504 <http://dx.doi.org/10.1101/498717>.
- 505 28. Lay C, Shi M, Buček A, Bourguignon T, Lo N, Holmes EC. Unmapped RNA virus  
506 diversity in termites and their symbionts. *Viruses*. 2020;12:1145.
- 507 29. Chiapello M, Bosco L, Ciuffo M, Ottati S, Salem N, Rosa C, et al. Complexity and  
508 local specificity of the virome associated with tospovirus-transmitting thrips species. *J*  
509 *Virol*. 2021;JVI. 00597-21.
- 510 30. Geoghegan JL, Di Giallonardo F, Wille M, Ortiz-Baez AS, Costa VA, Ghaly T, et  
511 al. Virome composition in marine fish revealed by meta-transcriptomics. *Virus Evol*.  
512 2021;7:veab005.
- 513 31. Paraskevopoulou S, Käfer S, Zirkel F, Donath A, Petersen M, Liu S, et al. Viromics  
514 of extant insect orders unveil the evolution of the flavi-like superfamily. *Virus Evol*.  
515 2021;7:veab030.
- 516 32. Spear A, Sisterson MS, Yokomi R, Stenger DC. Plant-feeding insects harbor  
517 double-stranded RNA viruses encoding a novel proline-alanine rich protein and a  
518 polymerase distantly related to that of fungal viruses. *Virology*. 2010;404:304-11.
- 519 33. Brooks AW, Kohl KD, Brucker RM, van Opstal EJ, Bordenstein SR.  
520 Phylosymbiosis: relationships and functional effects of microbial communities across  
521 host evolutionary history. *PLoS Biol*. 2016;14:e2000225.
- 522 34. Leigh BA, Bordenstein SR, Brooks AW, Mikaelyan A, Bordenstein SR. Finer-  
523 scale phylosymbiosis: insights from insect viromes. *mSystems*. 2018;3:e00131-18.
- 524 35. Song H, Béthoux O, Shin S, Donath A, Simon S. Phylogenomic analysis sheds  
525 light on the evolutionary pathways towards acoustic communication in Orthoptera. *Nat*  
526 *Commun*. 2020;11:4939.

- 527 36. De Vienne DM, Giraud T, Martin OC. A congruence index for testing topological  
528 similarity between trees. *Bioinformatics*. 2007;23:3119-24.
- 529 37. Hommola K, Smith JE, Qiu Y, Gilks WR. A permutation test of host–parasite  
530 cospeciation. *Mol Biol Evol*. 2009;26:1457-68.
- 531 38. Gibbs AJ, Wood J, Garcia-Arenal F, Ohshima K, Armstrong JS. Tobamoviruses  
532 have probably co-diverged with their eudicotyledonous hosts for at least 110 million  
533 years. *Virus Evol*. 2015;1:vev019.
- 534 39. Lewis SH, Quarles KA, Yang Y, Tanguy M, Frézal L, Smith SA, et al. Pan-  
535 arthropod analysis reveals somatic piRNAs as an ancestral defence against transposable  
536 elements. *Nat Ecol Evol*. 2018;2:174-81.
- 537 40. Abd-Alla AM, Meki IK, Demirbas-Uzel G. Insect viruses as biocontrol agents:  
538 Challenges and opportunities. *Cottage Industry of Biocontrol Agents and Their*  
539 *Applications*; 2020. pp. 277-295.
- 540 41. İnce İA, Özcan O, Ilter-Akulke AZ, Scully ED, Özgen A. Invertebrate iridoviruses:  
541 a glance over the last decade. *Viruses*. 2018;10:161.
- 542 42. Sun X. History and current status of development and use of viral insecticides in  
543 China. *Viruses*. 2015;7:306-19.
- 544 43. Walters H. Grasshopper transmission of three plant viruses. *Science*. 1951;113:36-  
545 7.
- 546 44. Nunamaker RA, Lockwood JA, Stith CE, Campbell CL, Schell SP, Drolet BS, et  
547 al. Grasshoppers (Orthoptera: Acrididae) could serve as reservoirs and vectors of  
548 *Vesicular Stomatitis Virus*. *J Med Entomol*. 2003;40:957-63.
- 549 45. Drolet BS, Stuart MA, Derner JD. Infection of *Melanoplus sanguinipes*  
550 grasshoppers following ingestion of rangeland plant species harboring *Vesicular*  
551 *Stomatitis Virus*. *Appl Environ Microb*. 2009;75:3029-33.

- 552 46. Brucker RM, Bordenstein SR. The hologenomic basis of speciation: gut bacteria  
553 cause hybrid lethality in the genus *Nasonia*. *Science*. 2013;341:667-9.
- 554 47. Easson CG, Thacker RW. Phylogenetic signal in the community structure of host-  
555 specific microbiomes of tropical marine sponges. *Front Microbiol*. 2014;5:532.
- 556 48. Sanders JG, Powell S, Kronauer DJ, Vasconcelos HL, Frederickson ME, Pierce NE.  
557 Stability and phylogenetic correlation in gut microbiota: lessons from ants and apes.  
558 *Mol Ecol*. 2014;23:1268-83.
- 559 49. Roossinck MJ. Symbiosis versus competition in plant virus evolution. *Nat Rev*  
560 *Microbiol*. 2005;3:917-24.
- 561 50. Minot S, Sinha R, Chen J, Li H, Keilbaugh SA, Wu GD, et al. The human gut  
562 virome: inter-individual variation and dynamic response to diet. *Genome Res*.  
563 2011;21:1616-25.
- 564 51. Belda E, Nanack-Minkeu F, Eiglmeier K, Carissimo G, Holm I, Diallo M, et al.  
565 De novo profiling of RNA viruses in *Anopheles malaria* vector mosquitoes from forest  
566 ecological zones in Senegal and Cambodia. *BMC Genomics*. 2019;20:664.
- 567 52. Zhang W, Zhang YC, Wang ZG, Gu QY, Niu JZ, Wang JJ. The diversity of viral  
568 community in invasive fruit flies (*Bactrocera* and *Zeugodacus*) revealed by Meta-  
569 transcriptomics. *Micro Ecol*. Available from: [https://doi.org/10.1007/s00248-021-](https://doi.org/10.1007/s00248-021-01790-z)  
570 01790-z.
- 571 53. Obbard DJ. Expansion of the metazoan virosphere: progress, pitfalls, and prospects.  
572 *Curr Opin Virol*. 2018;31:17-23.
- 573 54. Grabherr MG, Haas BJ, Yassour M, Levin JZ, Amit I. Trinity: reconstructing a  
574 full-length transcriptome without a genome from RNA-Seq data. *Nat Biotechnol*.  
575 2011;29:644-52.

- 576 55. Huson DH, Buchfink B. Fast and sensitive protein alignment using DIAMOND.  
577 Nat Methods. 2015;12:59-60.
- 578 56. Fu, L., Niu, B., Zhu, Z., et al. CD-HIT: Accelerated for clustering the next-  
579 generation sequencing data. Oxford University Press; 2012. pp. 3150-52.
- 580 57. Eddy SR. Accelerated profile HMM searches. PLoS Comput Biol.  
581 2011;7:e1002195.
- 582 58. Patro R, Duggal G, Love MI, Irizarry RA, Kingsford C. Salmon: Provides Fast and  
583 Bias-aware Quantification of Transcript Expression. Nat Methods. 2017;14:417-9.
- 584 59. Katoh K, Standley DM. MAFFT multiple sequence alignment software version 7:  
585 improvements in performance and usability. Mol Biol Evol. 2013;30:772-80.
- 586 60. Capella-Gutiérrez S, Silla-Martínez JM, Gabaldón T. trimAl: a tool for automated  
587 alignment trimming in large-scale phylogenetic analyses. Bioinformatics.  
588 2009;25:1972-3.
- 589 61. Zhang D, Gao F, Jakovlić I, Zou H, Zhang J, Li WX, et al. PhyloSuite: An  
590 integrated and scalable desktop platform for streamlined molecular sequence data  
591 management and evolutionary phylogenetics studies. Mol Ecol Res. 2020;20:348-55.
- 592 62. Nguyen LT, Schmidt HA, Von Haeseler A, Minh BQ. IQ-TREE: A fast and  
593 effective stochastic algorithm for estimating maximum-likelihood phylogenies. Mol  
594 Biol Evol. 2015;32:268-74.
- 595 63. Kozlov AM, Darriba D, Flouri T, Morel B, Stamatakis A. RAxML-NG: A fast,  
596 scalable, and user-friendly tool for maximum likelihood phylogenetic inference.  
597 Bioinformatics. 2019;35:4453-5.
- 598 64. Legendre P, Desdevises Y, Bazin E. A statistical Test for host–parasite coevolution.  
599 Syst Biol. 2002;51:217-34.

600 65. Team RDC. R: A Language and Environment for Statistical Computing (version  
601 4.1.1). R Foundation for Statistical Computing. 2021.

602 66. Oksanen J, Blanchet F, Kindt R, Legendre P, Minchin P, O'Hara R, et al. Vegan:  
603 Community Ecology Package. 2020.

604 67. Xu Y, Alia T, Li X, Shi W, C C. The discovery of viruses associated with the fall  
605 armyworm *Spodoptera frugiperda* by high-throughput sequencing. *J Plants Prot*,  
606 2020;47:807-14.

607 68. Wang X, Fang X, Yang P, Jiang X, Jiang F, Zhao D, et al. The locust genome  
608 provides insight into swarm formation and long-distance flight. *Nat Commun*.  
609 2014;5:1-9.

610 69. Langmead B, Salzberg SL. Fast gapped-read alignment with Bowtie 2. *Nat*  
611 *Methods*. 2012;9:357-359.

## 612 **Supporting information**

613 **S1 Fig. Maximum likelihood phylogeny of the *Chuviridae*, *Lispiviridae*,**  
614 ***Rhabdoviridae*, *Xinmoviridae*, and *Nyamiviridae*.** Phylogenetic tree was constructed  
615 using RdRp or polymerase sequences. Viruses were colored differently according to  
616 their hosts. Within each phylogeny, viruses described in this study are marked in red  
617 and novel viruses have red solid pentagrams at the back of their names.

618 **S2 Fig. Maximum likelihood phylogeny of the *Caliciviridae*, *Dicistroviridae*,**  
619 ***Iflaviridae*, *Polycipiviridae*, *Secoviridae*, and *Soliniviridae*.** Phylogenetic tree was  
620 constructed using RdRp or polymerase sequences.

621 **S3 Fig. Maximum likelihood phylogeny of the *Hantaviridae*, *Peribunyaviridae*,**  
622 ***Phasmaviridae*, and *Phenuiviridae*.** Phylogenetic tree was constructed using RdRp or  
623 polymerase sequences.

624 **S4 Fig. Maximum likelihood phylogeny of the *Virgaviridae*.** Phylogenetic tree was

625 constructed using RdRp or polymerase sequences.

626 **S5 Fig. Maximum likelihood phylogeny of the *Partitiviridae*.** Phylogenetic tree was

627 constructed using RdRp or polymerase sequences.

628 **S6 Fig. Maximum likelihood phylogeny of the *Flaviviridae*.** Phylogenetic tree was

629 constructed using RdRp or polymerase sequences.

630 **S7 Fig. Maximum likelihood phylogeny of the *Totiviridae*.** Phylogenetic tree was

631 constructed using RdRp or polymerase sequences.

632 **S8 Fig. Maximum likelihood phylogeny of the *Parvoviridae*.** Phylogenetic tree of

633 *Parvoviridae* constructed using capsid protein.

634 **S9 Fig. Maximum likelihood phylogeny of the *Nodaviridae*, *Permutotetraviridae*,**

635 ***Quenyaviruses*, *Reoviridae*, *Tombusviridae*, and *Totiviridae*.** Phylogenetic tree was

636 constructed using RdRp or polymerase sequences.

637 **S1 Table. Sample collection information and data availability.** Excel table providing

638 host species, NCBI project accessions, Collection location and time, Sequencing

639 strategy and depth.

640 **S2 Table. Identified viruses from this study.**

641 **S3 Table. Virome composition of 34 grasshopper species and viruses' abundance.**

642 **S4 Table. The prevalence of the viruses from *Dasyhippus barbipes* and *Bryodema***

643 ***luctuosum luctuosum* populations in different years.** Excel table providing primer

644 sequences of 42 viruses used to detect the persistence of the viruses.

645 **S5 Table. Primer sequences of 53 viruses used to investigate natural prevalence.**

646 **S1 Data. Complete or near-complete genome sequences of 65 novel viral species.**
